# Supplementary material
Source: publisher figshare collection journal article supplement (https://acs.figshare.com/ndownloader/files/13275899)
Supplement: Supplementary file 1 [file 13275899]

# **Alkali Metal Assisted Synthesis of Graphite Carbon Nitride with Tunable Band-Gap for Enhanced Visible-Light-Driven Photocatalytic Performance**

Wenjun Wang <sup>a, 1</sup>, Piao Xu <sup>a, 1</sup>, Ming Chen <sup>a,1</sup>, Guangming Zeng <sup>a, \*</sup>, Chen Zhang <sup>a, \*</sup>, Chengyun Zhou <sup>a</sup>, Yang Yang <sup>a</sup>, Danlian Huang <sup>a</sup>, Cui Lai <sup>a</sup>, Min Cheng <sup>a</sup>, Liang Hu <sup>b</sup>, Weiping Xiong <sup>a</sup>, Hai Guo <sup>a</sup>, Man Zhou <sup>a</sup>

***a** College of Environmental Science and Engineering, Hunan University and Key Laboratory of Environmental Biology and Pollution Control (Hunan University), Ministry of Education, 8 South Lushan Road, Yuelu District, Changsha 410082, P.R. China*

***b** School of Minerals Processing and Bioengineering, Central South University and Key Laboratory of Biohydrometallurgy (Central South University, Ministry of Education, 932 South Lushan Road, Yuelu District, Changsha 410083, P.R. China*

Total number of pages: 14

Total number of figures: 10

Total number of tables: 2

---

\* Corresponding authors at: College of Environmental Science and Engineering, Hunan University, Changsha 410082, PR China.

*E-mail addresses:* zgming@hnu.edu.cn (G. Zeng), zhangchen@hnu.edu.cn (C. Zhang).

<sup>1</sup> These authors contribute equally to this article.

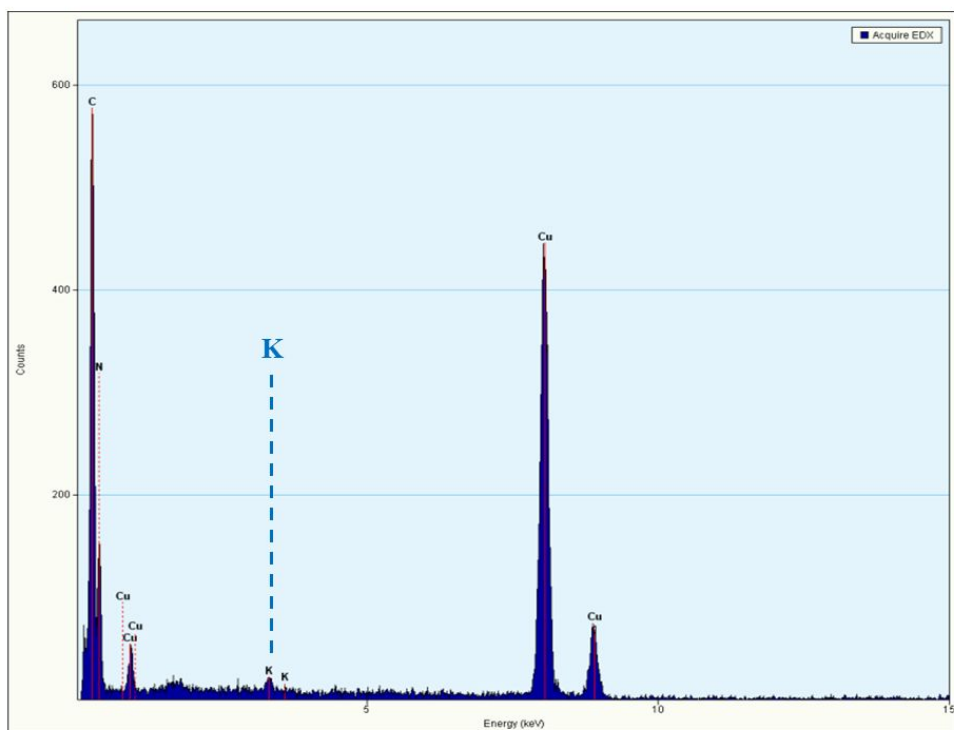

**Figure S1.** TEM EDS spectrum of KMCN (0.05).

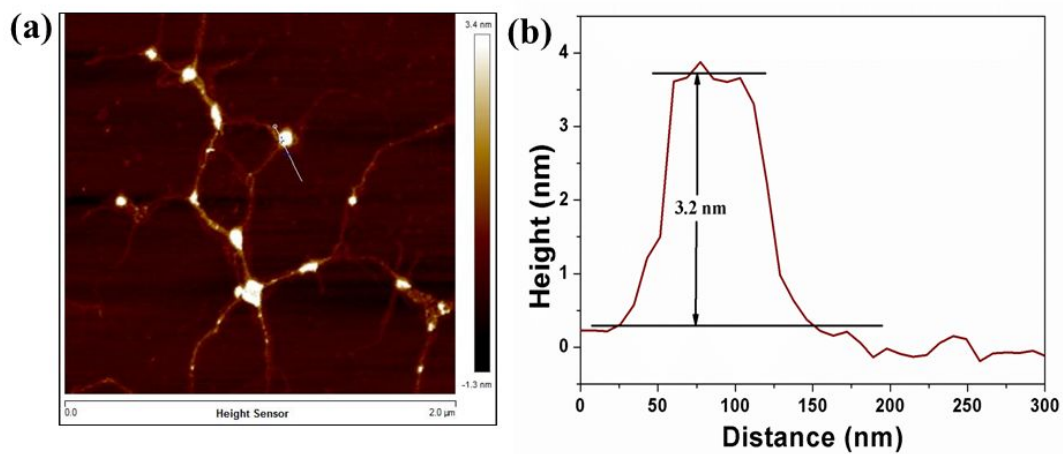

Figure S2. (a) AFM image and (b) the height distribution profile of KMCN (0.05).

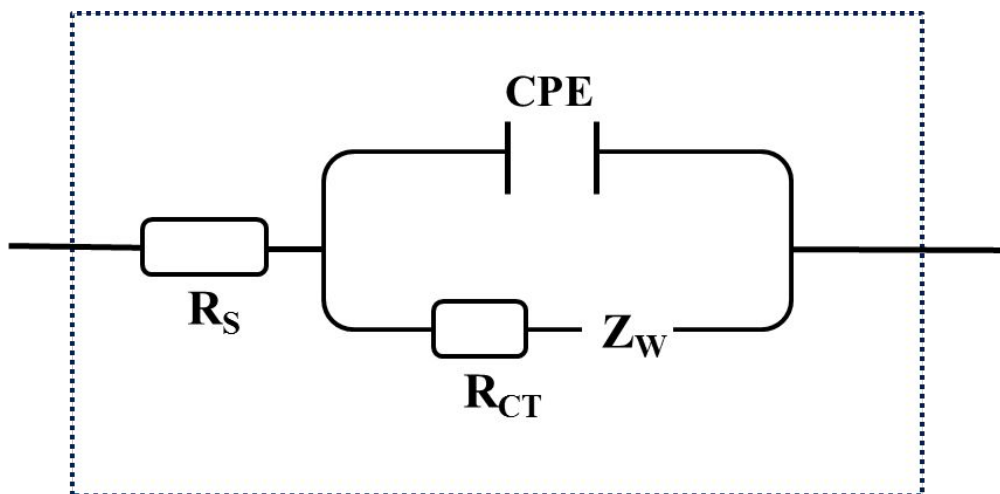

Figure S3. Equivalent circuit diagram:  $R_s$  is the Ohmic resistance of the electrolyte;  $R_{CT}$  is the charge transfer resistance;  $Z_W$  is Warburg impedance, and  $CPE$  is constant phase element. The measured EIS data can be simulated with this equivalent circuit.

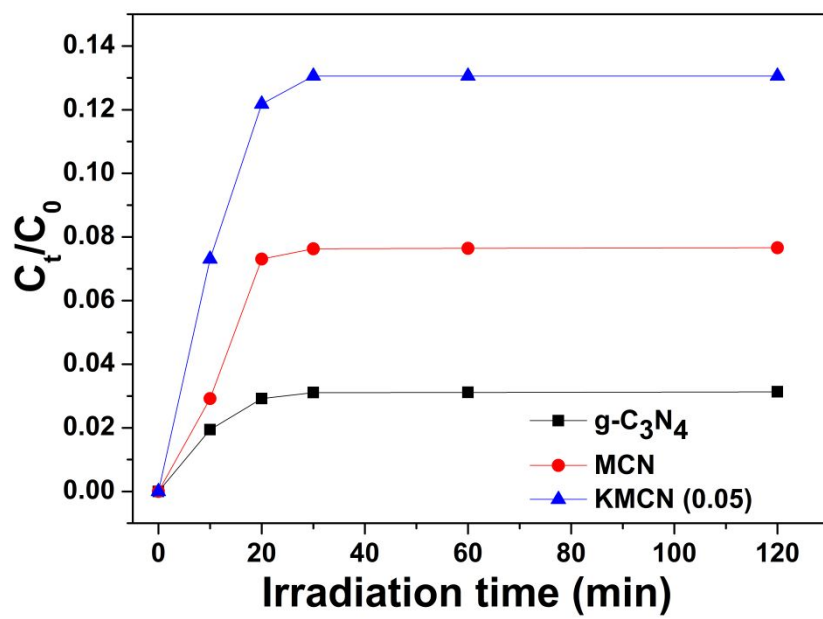

**Figure S4.** Adsorption ability evaluation for TC pollutants by bulk g-C<sub>3</sub>N<sub>4</sub>, MCN and KMCN (0.05) catalysts in the darkness.

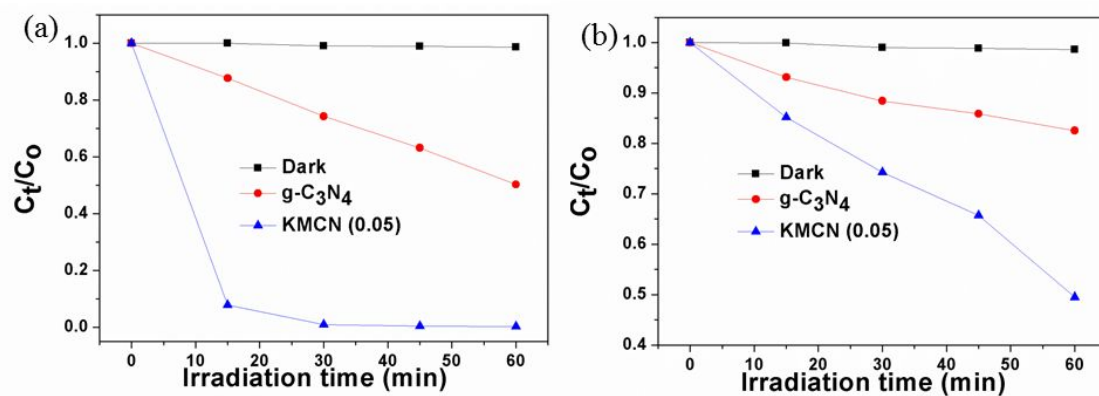

**Figure S5.** Photocatalytic degradation of (a) Rhodamine B (10mg/L) and (b) ciprofloxacin (10mg/L) over g-C<sub>3</sub>N<sub>4</sub> and KMCN (0.05).

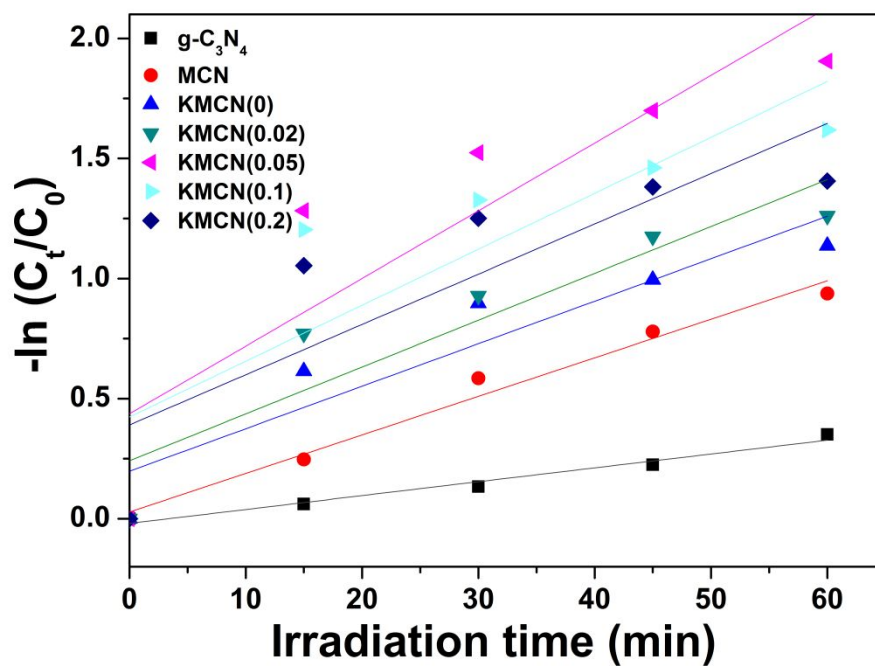

**Figure S6.** Pseudo-first-order kinetics of TC degradation by bulk  $g-C_3N_4$ , MCN and KMCN (x) catalysts.

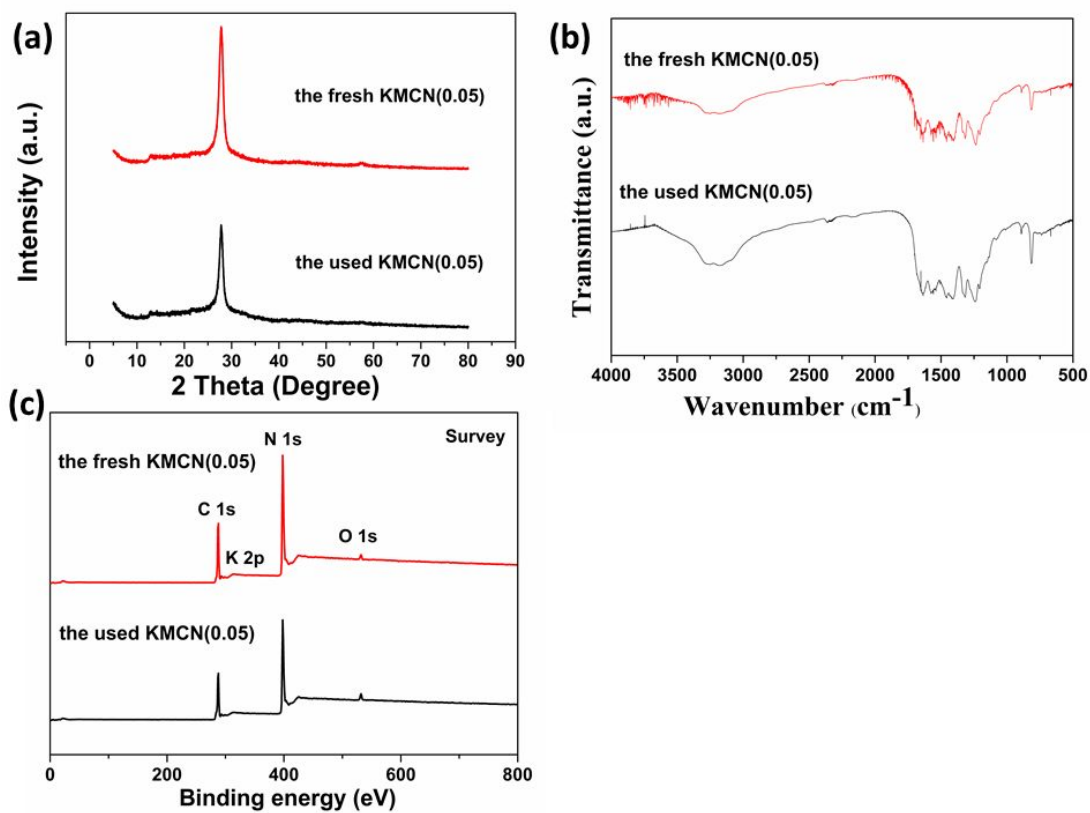

**Figure S7.** (a) XRD, (b) FT-IR and (c) XPS survey for fresh and used KMCN (0.05) sample.



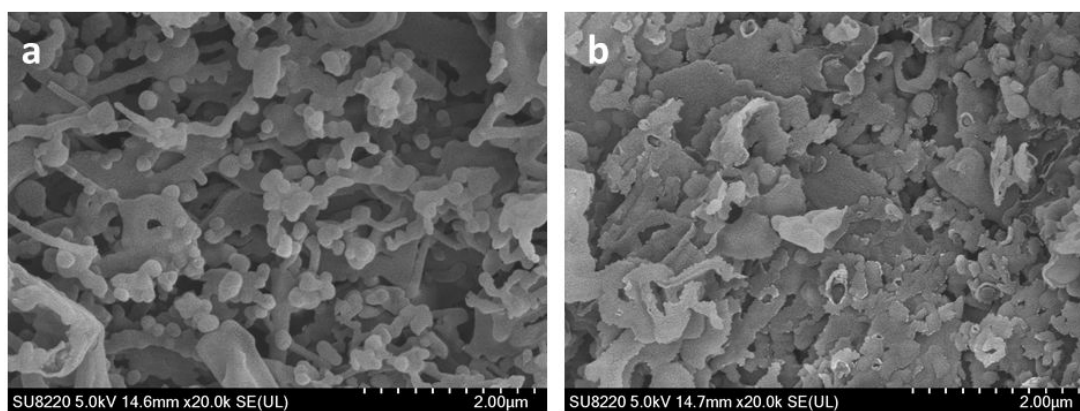

**Figure S8.** SEM images for (a) fresh sample and (b) used sample.

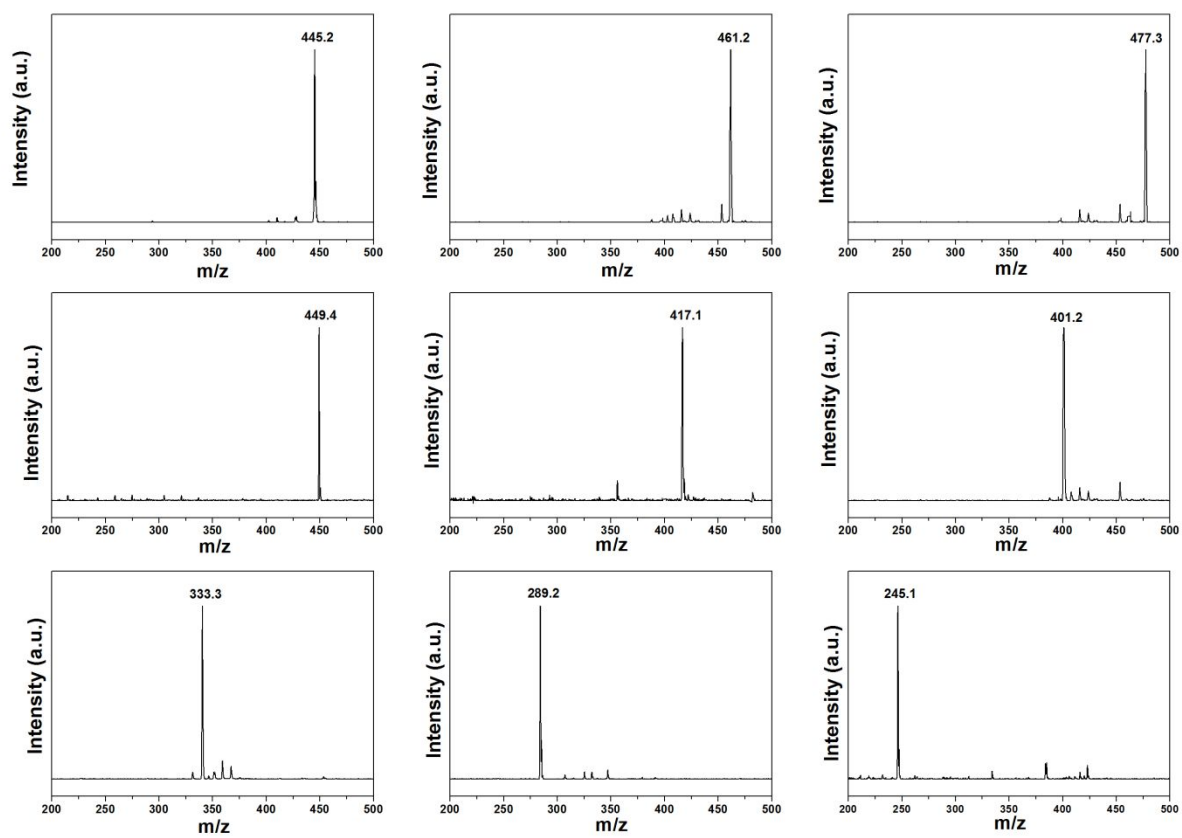

**Figure S9.** MS spectra of the TC and possible intermediates.

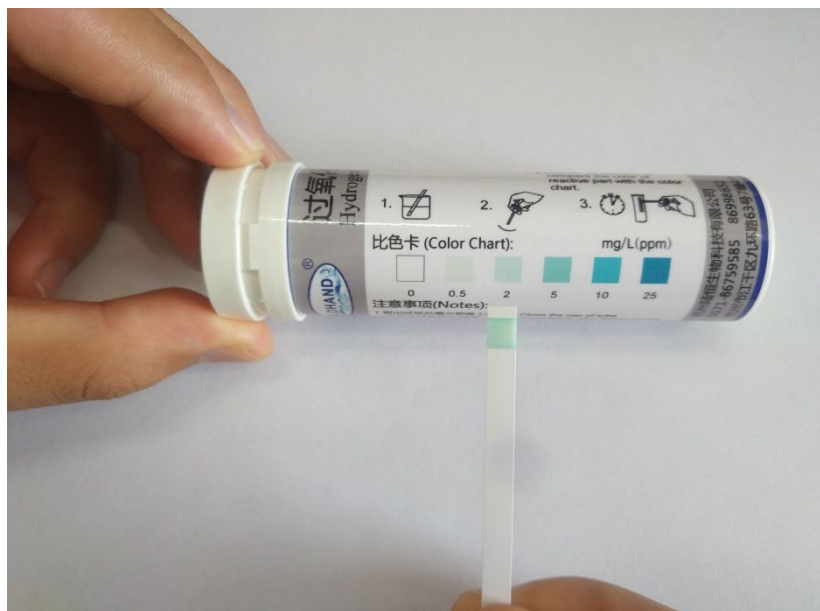

**Figure S10.** The concentration of intermediate product H<sub>2</sub>O<sub>2</sub> detected by the test paper.

**Table S1.** Fitting values of the equivalent circuit elements from the electrochemical impedance spectroscopy Data

| Samples                         | $R_{CT} (\Omega)$  | $R_S (\Omega)$ | CPE(F)                | $Z_W (m\Omega/s^{1/2})$ |
|---------------------------------|--------------------|----------------|-----------------------|-------------------------|
| g-C <sub>3</sub> N <sub>4</sub> | $3.31 \times 10^4$ | 38.76          | $9.62 \times 10^{-5}$ | 2.01                    |
| MCN                             | $3.20 \times 10^4$ | 37.34          | $8.87 \times 10^{-5}$ | 1.46                    |
| KMCN (0.05)                     | $2.87 \times 10^4$ | 34.59          | $1.24 \times 10^{-5}$ | 1.14                    |

**Table S2.** The structural information of the possible intermediates products.

| Compounds | Formula                 | m/z | Proposed structure |
|-----------|-------------------------|-----|--------------------|
| TC        | $C_{22}H_{24}N_2O_8$    | 445 |                    |
| TC 1      | $C_{22}H_{24}N_2O_9$    | 461 |                    |
| TC 2      | $C_{22}H_{24}N_2O_{10}$ | 477 |                    |
| TC 3      | $C_{20}H_{20}N_2O_{10}$ | 449 |                    |
| TC 4      | $C_{20}H_{20}N_2O_8$    | 417 |                    |
| TC 5      | $C_{20}H_{20}N_2O_7$    | 401 |                    |

|      |                   |     |                                                                                     |
|------|-------------------|-----|-------------------------------------------------------------------------------------|
| TC 6 | $C_{17}H_{16}O_7$ | 333 | 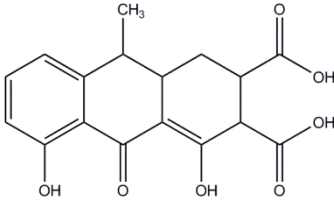 |
| TC 7 | $C_{16}H_{16}O_5$ | 289 |  |
| TC 8 | $C_{15}H_{16}O_3$ | 245 |  |
